# Supplementary material for: bioNerDS: exploring bioinformatics’ database and software use through literature mining
Source: Springer Nature journal article supplement (doi:10.1186/1471-2105-14-194), 2013-06-15

# Genome Biology Corpus

Change in Normalised Resource Use from Baseline in Year 0

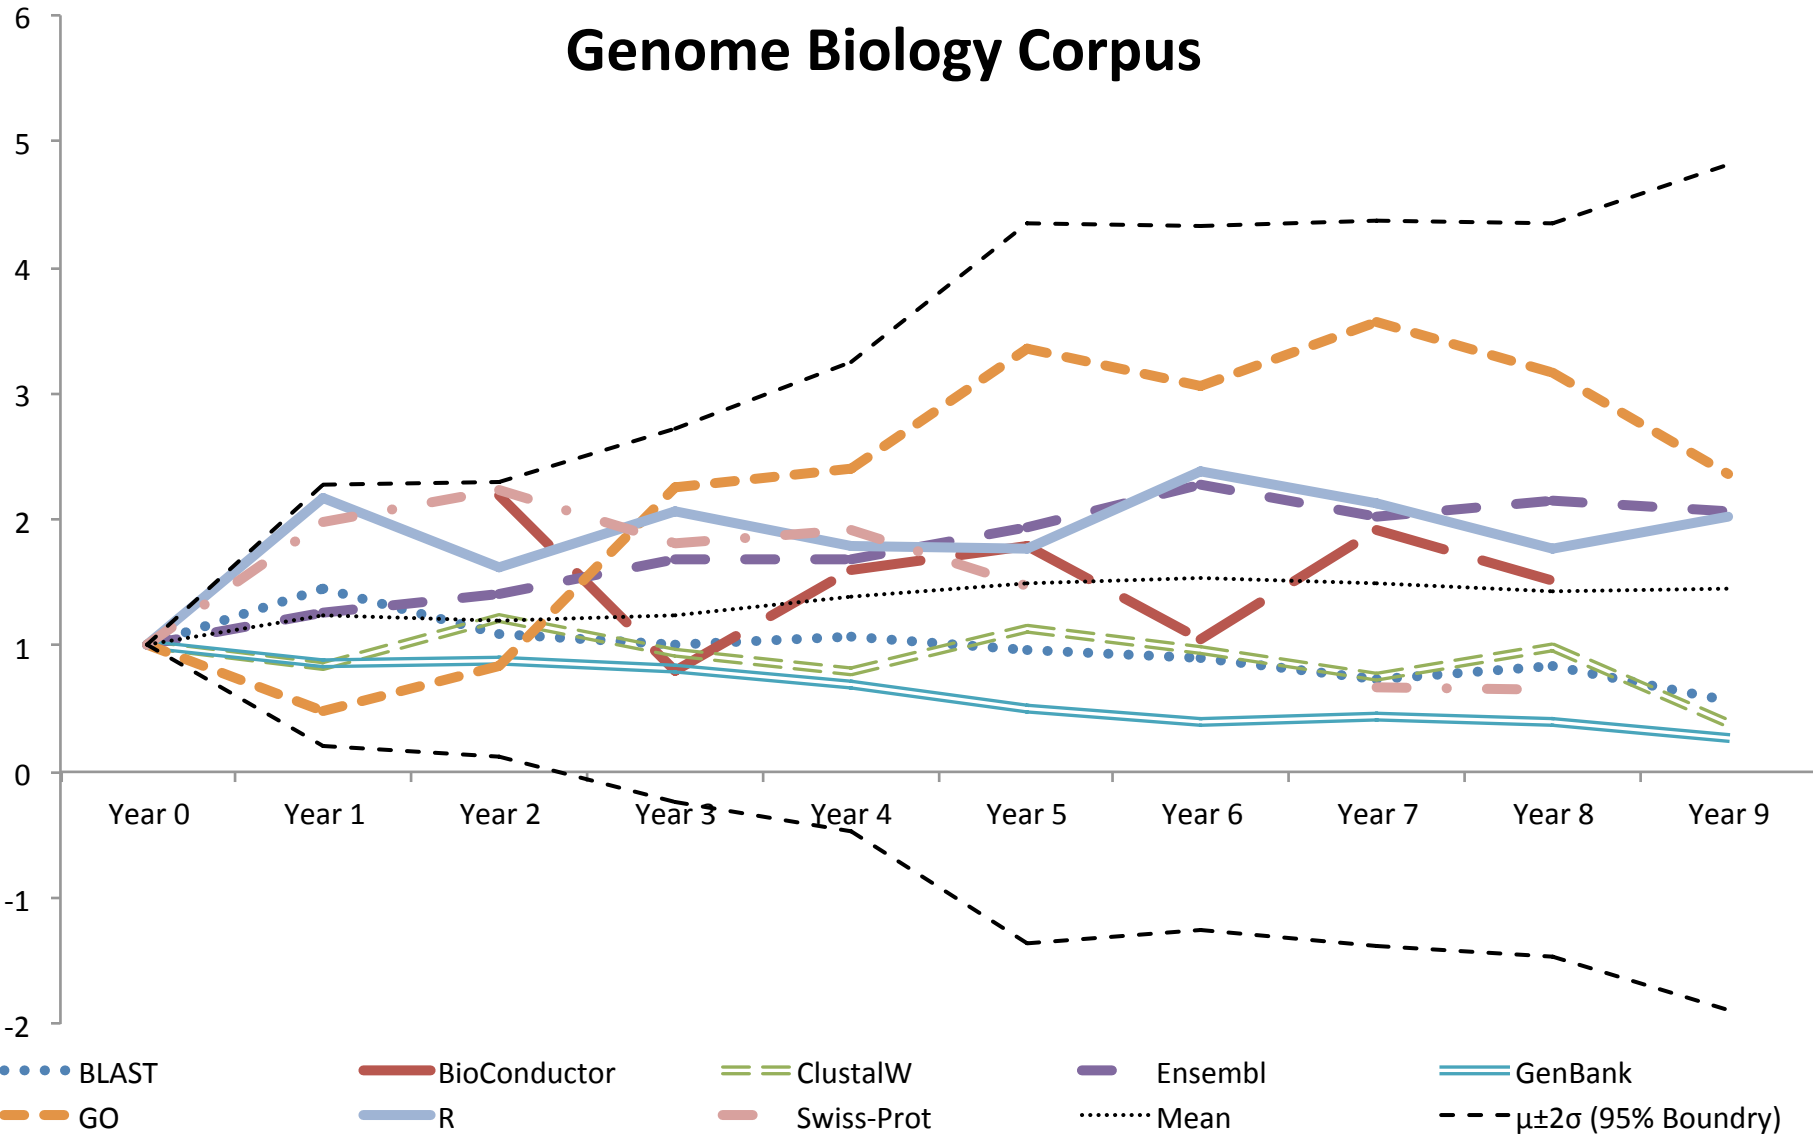

Supplement: 12859_2012_5938_MOESM6_ESM.pdf [file 12859_2012_5938_MOESM6_ESM.pdf]
